# Supplementary material for: Oxidation reduces spin-orbital coupling to achieve robust fluorescence emission in halogen-substituted dithieno[3,2-b:2′,3′-d]thiophene
Source: Royal Society of Chemistry journal article supplement (doi:10.1039/d5cp01121c), 2025-01-01
Supplement: d5cp01121c1.pdf [file d5cp01121c1.pdf]

## Supplementary information

### **Oxidation reduces spin-orbital coupling to achieve robust fluorescent emission in halogen substituted dithieno[3,2-b:2',3'-d]thiophene**

Huimin Liu,<sup>‡</sup> <sup>[a]</sup> Zeyan Zhuang,<sup>‡</sup> <sup>[c]</sup> Yawen Hou,<sup>[a]</sup> Yujiao Zhu,<sup>[a]</sup> Ruofeng Xu,<sup>[a]</sup> Bin Chen,<sup>\*[a]</sup> Rong Hu<sup>\*[b]</sup> and Zujin Zhao<sup>\*[c]</sup>

<sup>[a]</sup> School of Material Science and Chemical Engineering, Ningbo University, Ningbo, Zhejiang, 315211, China.

<sup>[b]</sup> School of Chemistry and Chemical Engineering, University of South China, Hengyang 421001, China.

<sup>[c]</sup> State Key Laboratory of Luminescent Materials and Devices, Key Laboratory of Luminescence from Molecular Aggregates of Guangdong Province, South China University of Technology, Guangzhou, 510640, China.

<sup>‡</sup> Huimin Liu and Zeyan Zhuang contributed equally to this work.

\* Corresponding author. E-mail: chenbin2@nbu.edu.cn; hurong@usc.edu.cn; mszjzhao@scut.edu.cn

## General information and methods

### Materials and Measurements

All chemicals and reagents were commercially available and used as received without further purification.  $^1\text{H}$  and  $^{13}\text{C}$  NMR spectra were acquired using the Bruker ARX 500 NMR spectrometer utilizing dichloromethane- $d_2$  as solvents with tetramethylsilane (TMS;  $\delta = 0$  ppm) acting as the internal reference. UV-vis were obtained by PerkinElmer Lambda 365 Spectrophotometer. The fluorescence spectrum was acquired using FluoroMax-4 Spectrophotometer. Single crystal data were measured on R-Axis RAPID with Mo-K $\alpha$  ( $\lambda = 0.71073$ ). The quantum yield (QY) was determined using a QE-2100 (Otsuka Electronics) device for measuring quantum efficiency, with a 150 W xenon lamp as the source of excitation. The fluorescent lifetime was measured by Horiba fluorescence spectrometer FL3-111. The excited-state geometry were optimized using time-dependent density function theory (TD-DFT) method with  $\omega$ b97XD hybrid functional at the basis set level of def2-SVP, using Gaussian 16 package, Revision B.01. No symmetry constraint was applied for optimization. The energy levels and spin-orbit coupling (SOC) values calculated at the level of  $\omega$ b97X-D3/def2-TZVP based on the optimized excited-state geometry by using ORCA 5.0.1.<sup>[1]</sup>

### Experimental procedures

#### Synthesis and characterization.

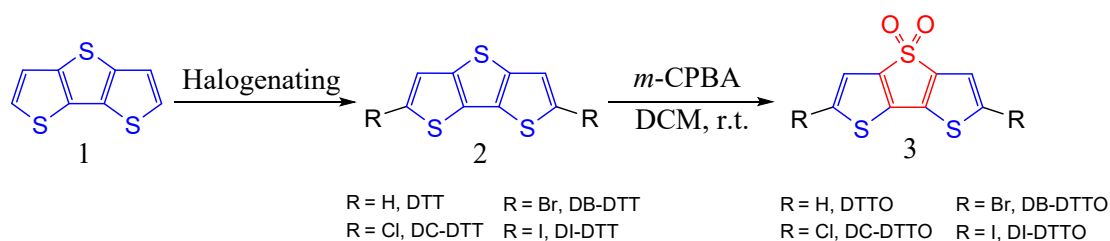

Scheme S1. Synthetic routes of molecules based on DTT and DTTO.

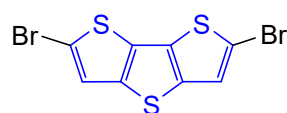

DB-DTT

#### 2,6-dibromodithieno[3,2-b:2',3'-d]thiophene (DB-DTT).

Dithieno [2,3-b:2',3'-d] thiophene (0.35 g, 1.8 mmol) and N-Bromosuccinimide (0.64 g, 3.6 mmol) were added in a 100 mL flask with 15 mL DMF. And then the mixture was stirred overnight at room temperature. After the reaction, the mixture was poured into brine and extracted twice with dichloromethane. The organic layers were dried by anhydrous magnesium sulfate. After filtration, the solvent was evaporated under reduced pressure and the residue was purified by silica-gel column chromatography

using petroleum ether as eluent. Obtaining a white solid of DB-DTT in 65% yield.  $^1\text{H}$  NMR (500 MHz, Chloroform- $d$ ),  $\delta$  (ppm): 7.28 (s, 2H);  $^{13}\text{C}$  NMR (125 MHz, Chloroform- $d$ ),  $\delta$  (ppm): 139.21, 130.96, 123.33, 112.50.

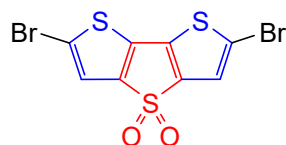

DB-DTTO

**2,6-dibromodithieno[3,2-b:2',3'-d]thiophene 4,4-dioxide**

**(DB-DTTO).** DB-DTT (0.212 g, 0.6 mmol) was added in a 100 mL flask with 5 mL dichloromethane. A solution of *m*-CPBA (0.517 g, 3 mmol) in  $\text{CH}_2\text{Cl}_2$  was added dropwise into the flask through constant pressure dropping funnel. The reaction was stirred for 10 hours at room temperature. After that, aqueous solution of sodium bicarbonate was added to quenching the reaction, and then extracted with excess  $\text{CH}_2\text{Cl}_2$ . The organic layers were dried by anhydrous magnesium sulfate. After filtration, the solvent was evaporated under reduced pressure and the residue was purified by silica-gel column chromatography using petroleum ether/ $\text{CH}_2\text{Cl}_2$ . Obtaining a yellow green solid of DB-DTTO in 59%.  $^1\text{H}$  NMR (500 MHz, Chloroform- $d$ ),  $\delta$  (ppm): 7.23 (s, 2H).  $^{13}\text{C}$  NMR (125 MHz, Chloroform- $d$ ),  $\delta$  (ppm): 141.34, 135.41, 122.88, 117.18.

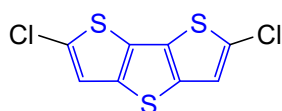

DC-DTT

**2,6-dichlorodithieno[3,2-b:2',3'-d]thiophene (DC-DTT).**

Dithieno [2,3-b:2',3'-d] thiophene (0.215 g, 1.1 mmol) and N-Chlorosuccinimide (0.323 g, 2.42 mmol) were added in a 100 mL flask with 15 mL DMF. The procedure was analogous to that described for DB-DTT. Obtaining a white solid of DC-DTT in 75% yield.  $^1\text{H}$  NMR (500 MHz, Chloroform- $d$ ),  $\delta$  (ppm): 7.15 (s, 1H).  $^{13}\text{C}$  NMR (125 MHz, Chloroform- $d$ ),  $\delta$  (ppm): 137.89, 130.16, 128.35, 120.00.

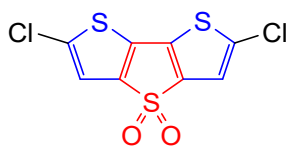

DC-DTTO

**2,6-dichlorodithieno[3,2-b:2',3'-d]thiophene 4,4-dioxide**

**(DC-DTTO).** The procedure was analogous to that described for DB-DTTO. Obtaining a yellow green solid of DC-DTTO in 41%. <sup>1</sup>H NMR (500 MHz, Chloroform-d), δ (ppm): 7.11 (s, 2H). <sup>13</sup>C NMR (126 MHz, Chloroform-d) δ (ppm): 140.04, 135.15, 132.47, 119.54.

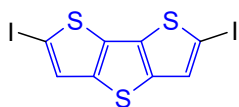

DI-DTT

**2,6-diiododithieno[3,2-b:2',3'-d]thiophene (DI-DTT).** Dithieno[2,3-b:2',3'-d] thiophene (0.530 g, 2.7 mmol) was added in a 100 mL flask with 15 mL CH<sub>2</sub>Cl<sub>2</sub>. At 0 °C, iodine (0.767 g, 3.02 mmol) and (Diacetoxyiodo)benzene (1.06 g, 3.29 mmol) were added in flask. The mixture was stirred 30 min at 0°C, and then overnight at room temperature. After the reaction, aqueous solution of sodium thiosulfate was added to quenching the reaction. The procedure was analogous to that described for DB-DTT. Obtaining a faint yellow solid of DI-DTT in 62%. <sup>1</sup>H NMR (500 MHz, Chloroform-d), δ (ppm): 7.41 (s, 2H). <sup>13</sup>C NMR (125 MHz, Chloroform-d), δ (ppm): 141.03, 135.15, 129.57, 73.55.

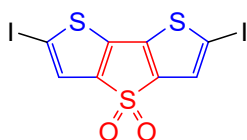

DI-DTTO

**2,6-diiododithieno[3,2-b:2',3'-d]thiophene 4,4-dioxide (DI-DTTO).** The procedure was analogous to that described for DB-DTTO. Obtaining a yellow solid of DI-DTTO in 15%. <sup>1</sup>H NMR (500 MHz, Chloroform-d), δ (ppm): 7.36 (s, 2H). <sup>13</sup>C NMR (125 MHz, Chloroform-d), δ (ppm): 142.97, 140.05, 128.99, 77.89.

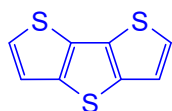

DTT

**dithieno[3,2-b:2',3'-d]thiophene (DTT).** The compound was purchased from LeYan, and further purified through recrystallization. <sup>1</sup>H NMR (500 MHz, Chloroform-d), δ (ppm): 7.36 (d, J = 5.2 Hz, 2H), 7.29 (d, J = 5.2 Hz, 2H). <sup>13</sup>C NMR (125 MHz, Chloroform-d), δ (ppm): 141.69, 130.96, 125.94, 120.90.

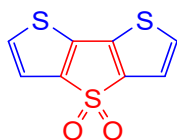

DTTO

**dithieno[3,2-b:2',3'-d]thiophene 4,4-dioxide (DTTO).** The procedure

was analogous to that described for DB-DTTO. Obtaining a yellow green solid of DTTO in 47%.  $^1\text{H}$  NMR (500 MHz, Chloroform-d),  $\delta$  (ppm): 7.36 (d,  $J = 5.2$  Hz, 2H), 7.23 (d,  $J = 5.1$  Hz, 2H).  $^{13}\text{C}$  NMR (125 MHz, Chloroform-d),  $\delta$  (ppm): 143.56, 136.21, 129.70, 120.47.

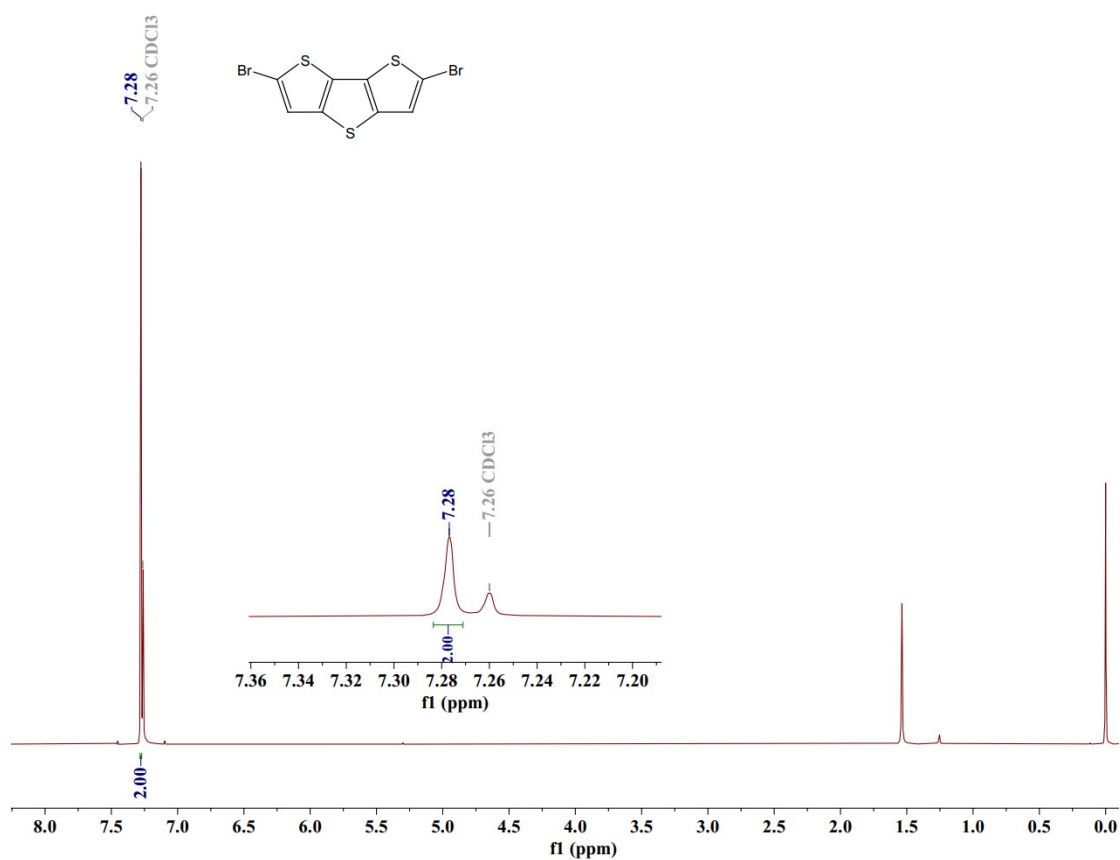

Figure S1.  $^1\text{H}$  NMR spectrum of **DB-DTT**.

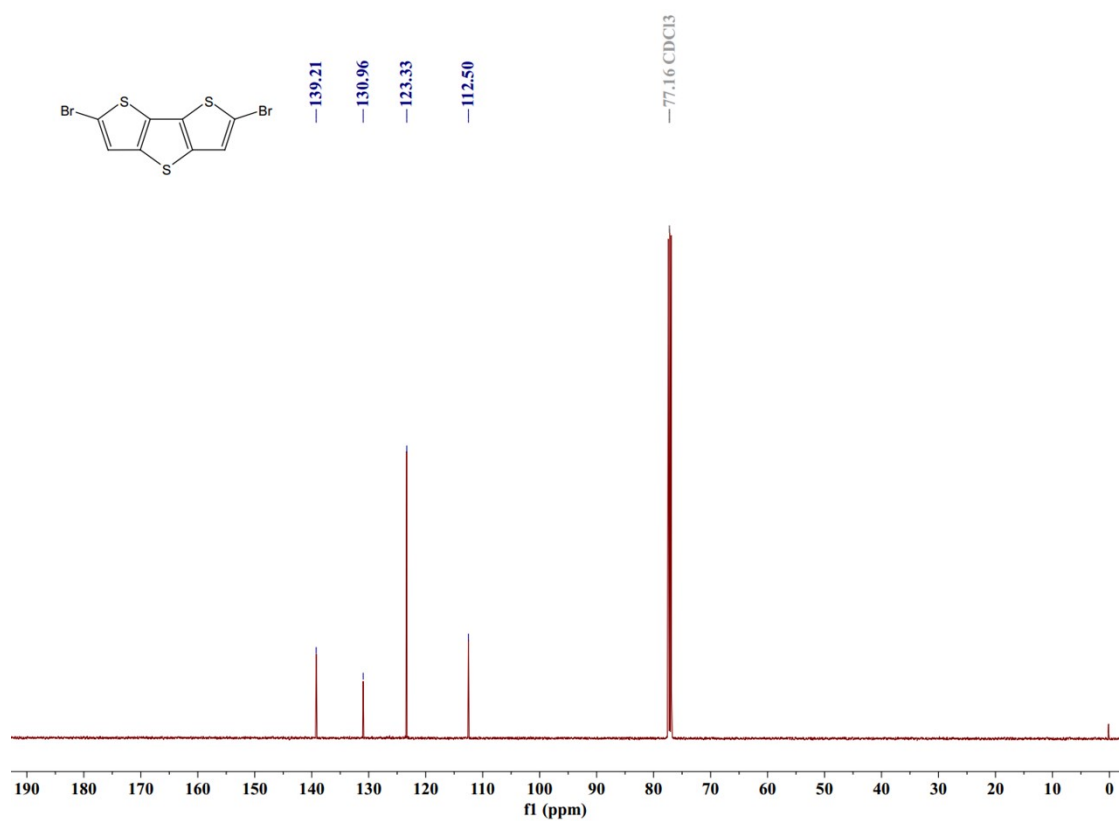

Figure S2.  $^{13}\text{C}$  NMR spectrum of **DB-DTT**.

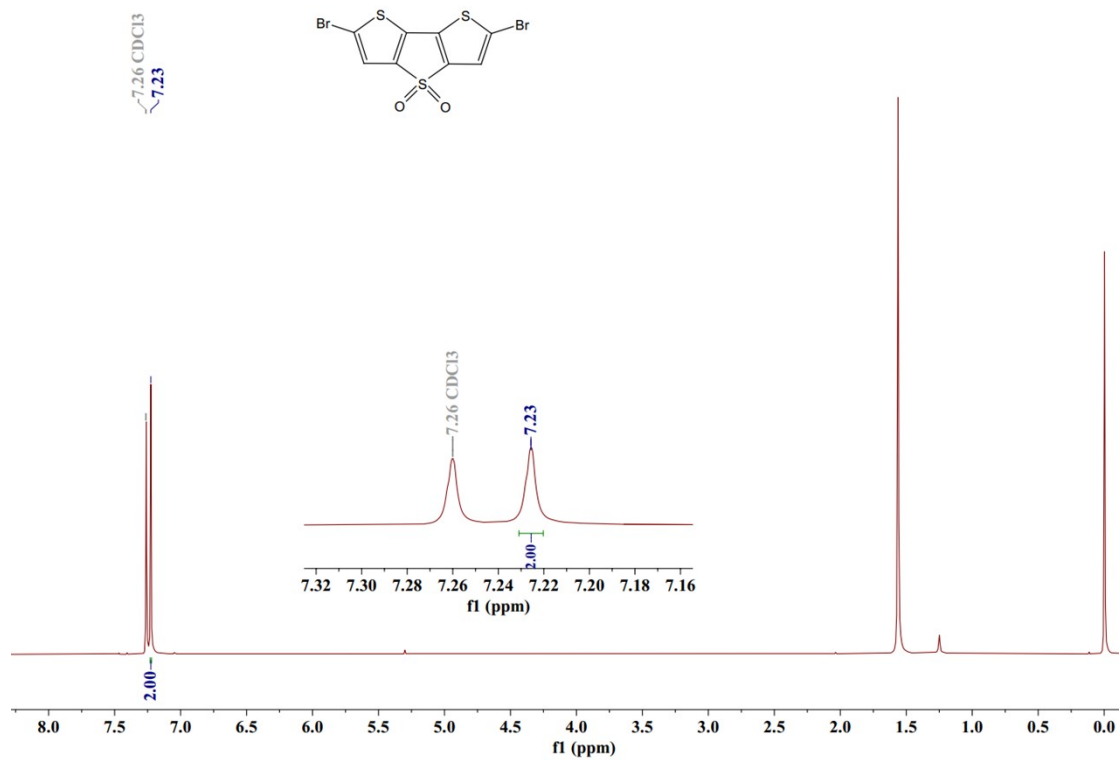

Figure S3.  $^1\text{H}$  NMR spectrum of **DB-DTTO**.

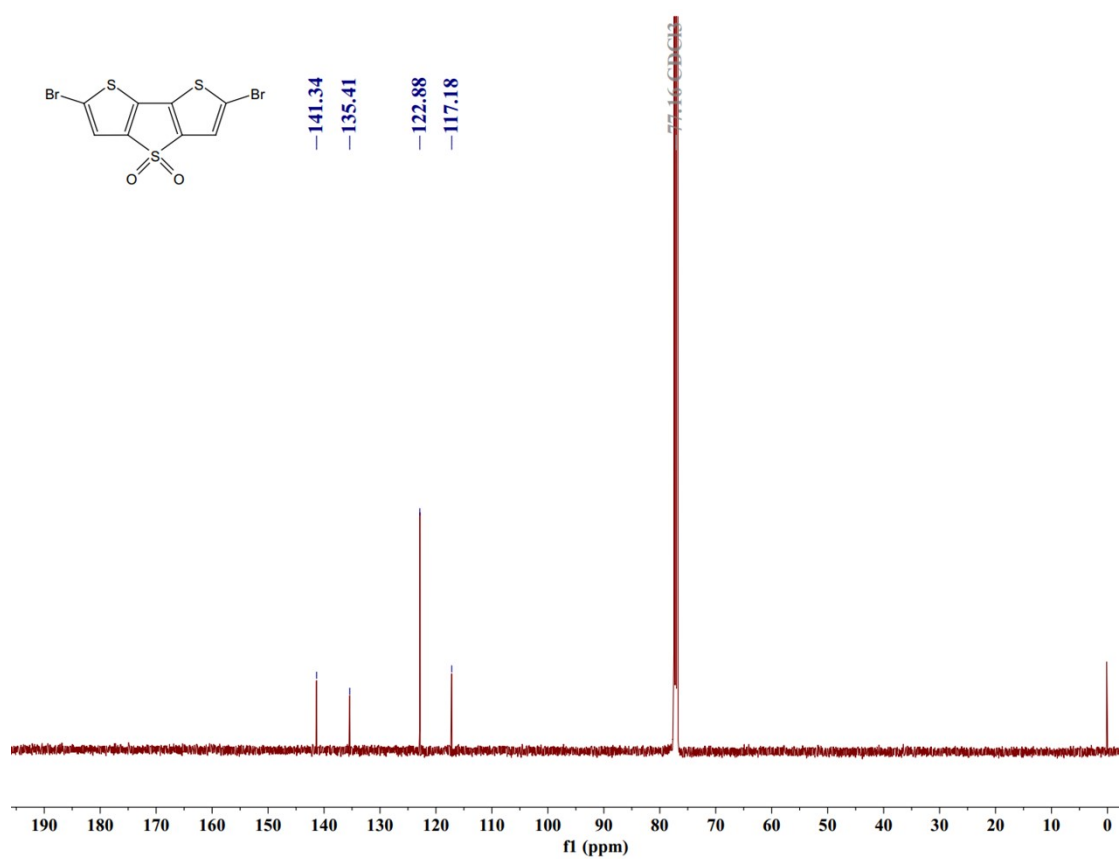

Figure S4.  $^{13}\text{C}$  NMR spectrum of **DB-DTTO**.

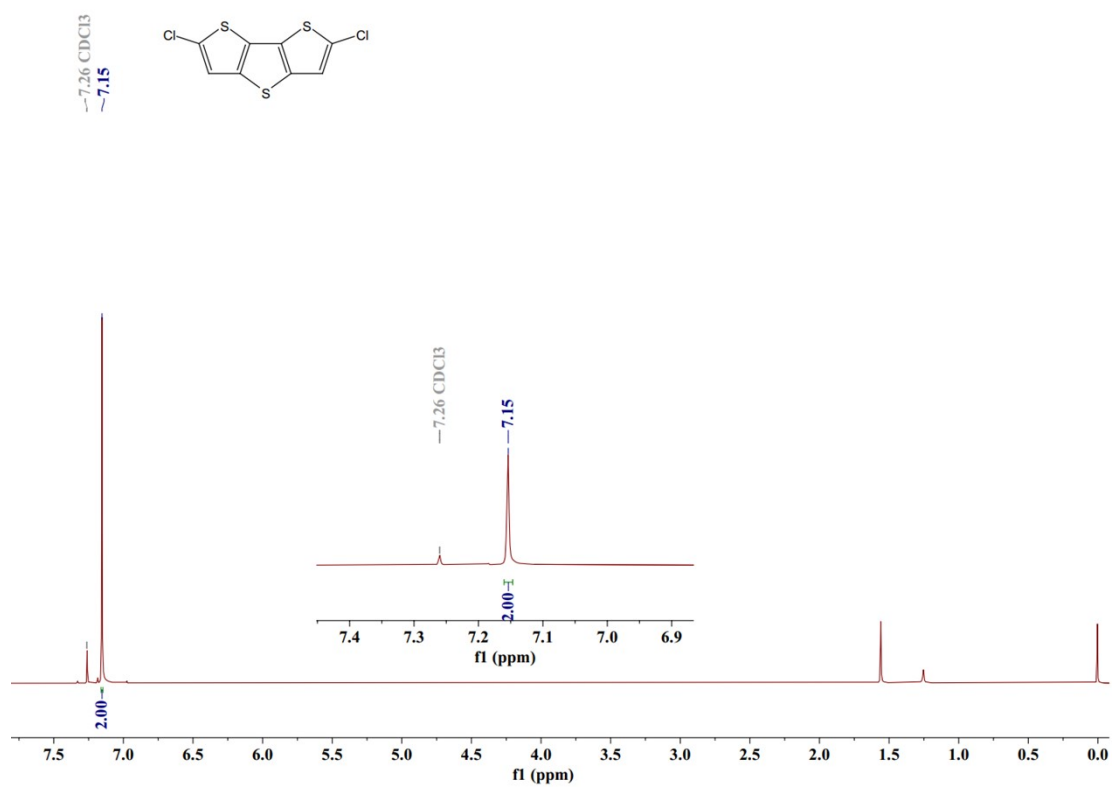

Figure S5.  $^1\text{H}$  NMR spectrum of **DC-DTT**.

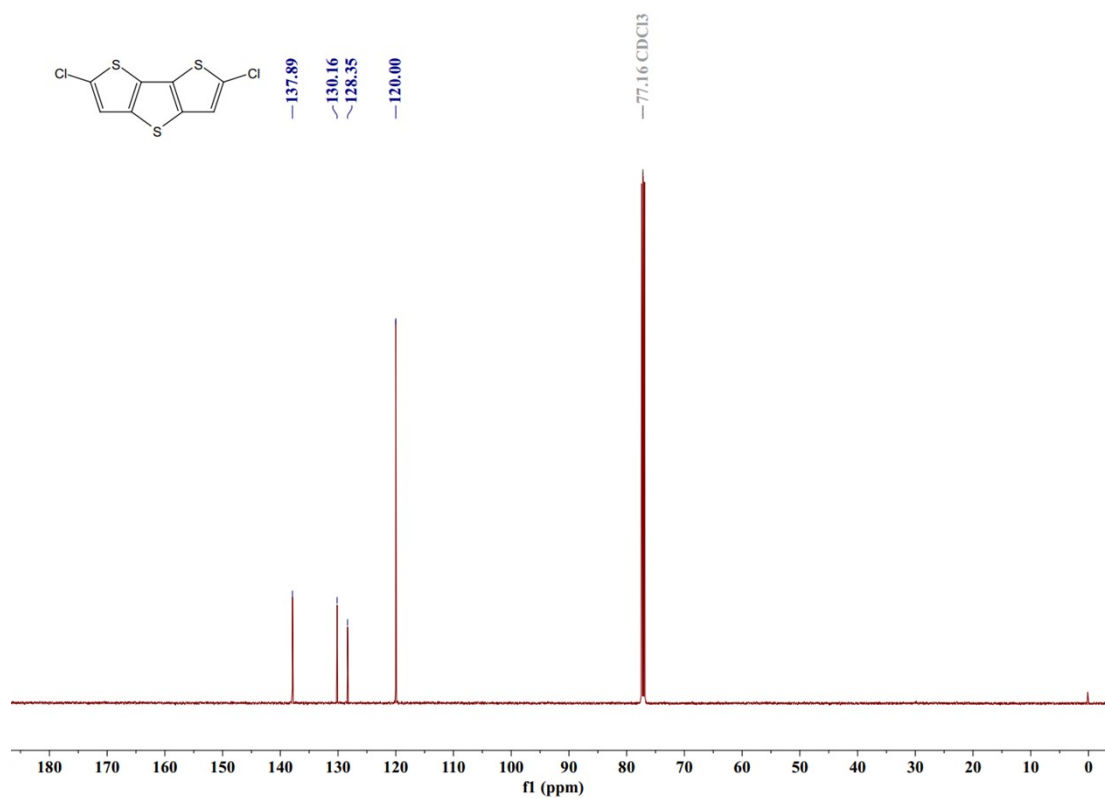

Figure S6. <sup>13</sup>C NMR spectrum of **DC-DTT**.

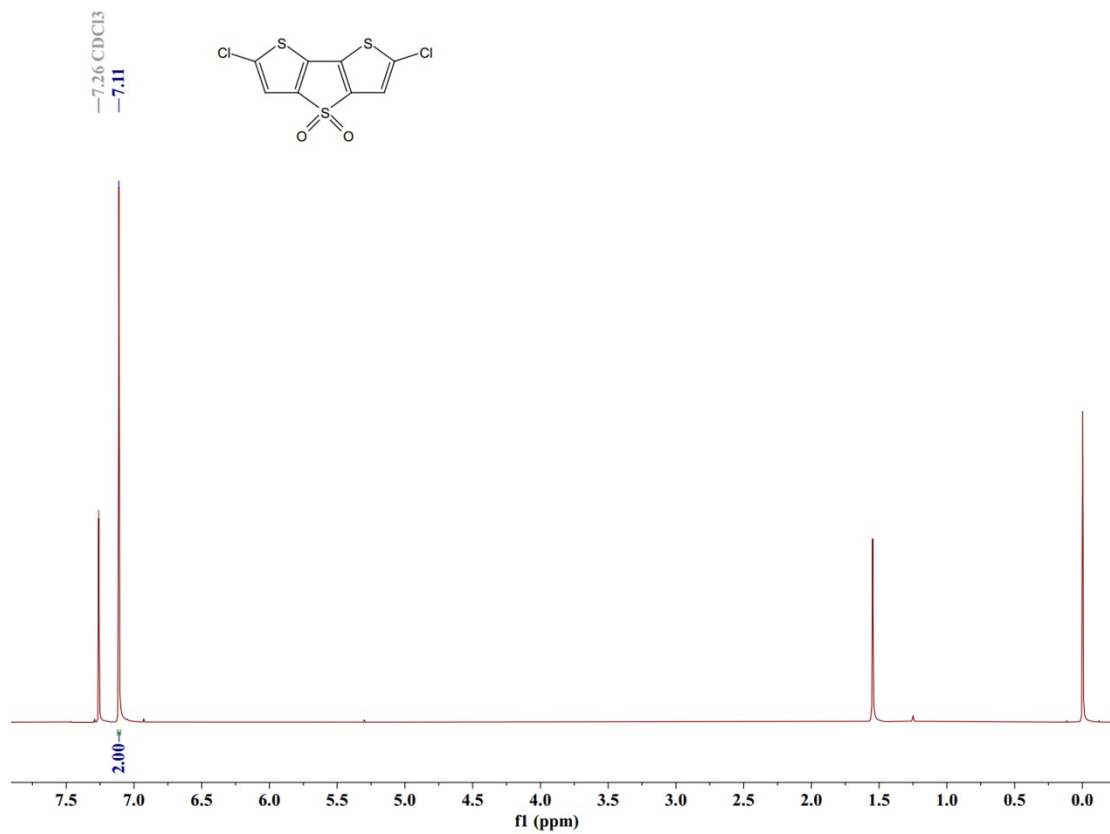

Figure S7. <sup>1</sup>H NMR spectrum of **DC-DTTO**.



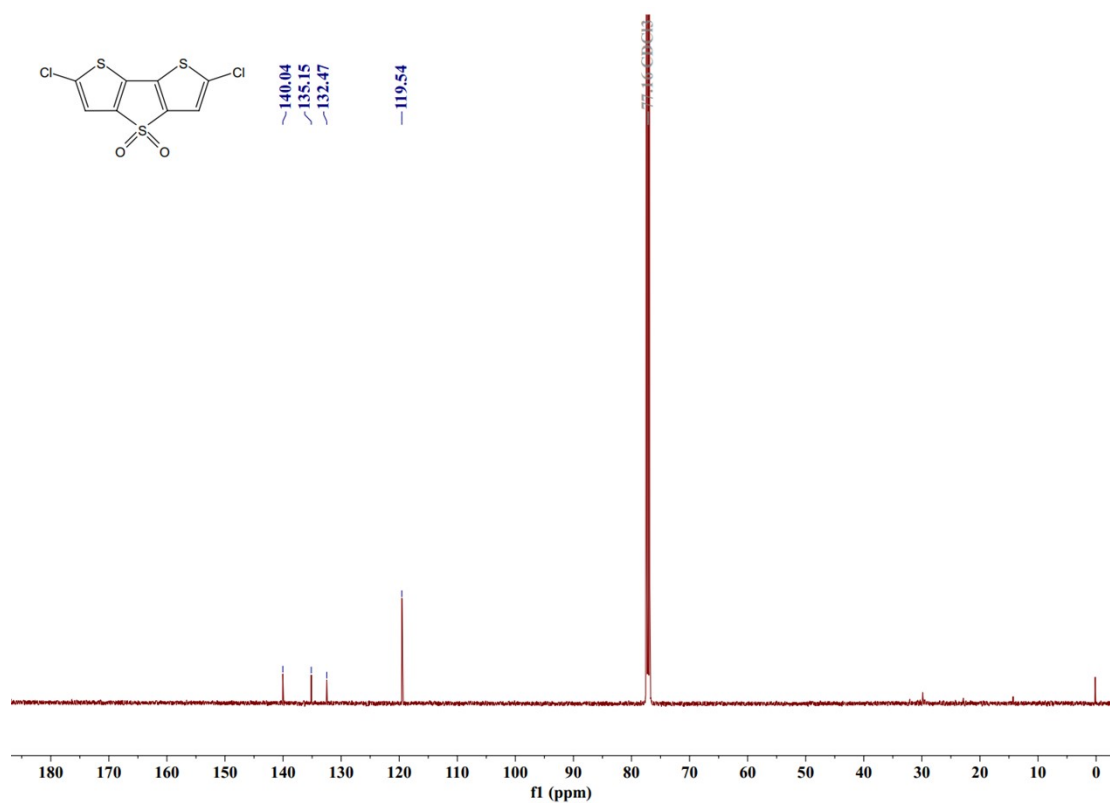

Figure S8.  $^{13}\text{C}$  NMR spectrum of **DC-DTTO**.

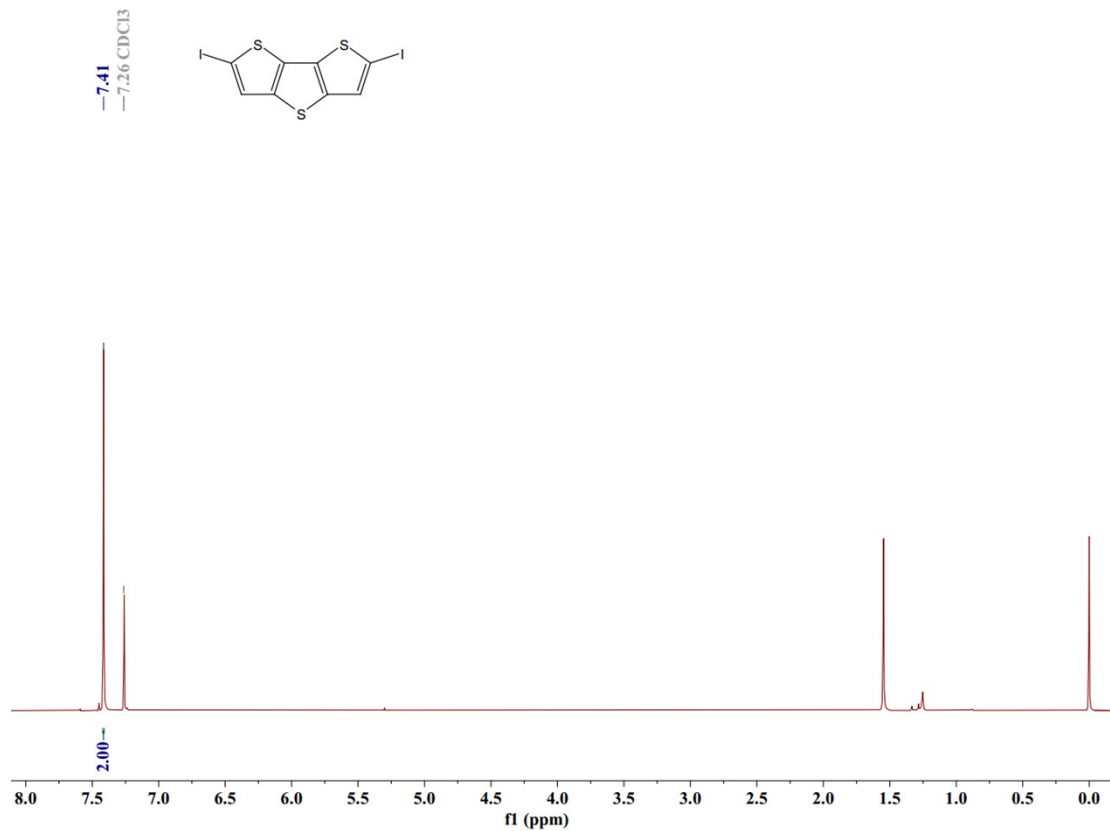

Figure S9.  $^1\text{H}$  NMR spectrum of **DI-DTT**.

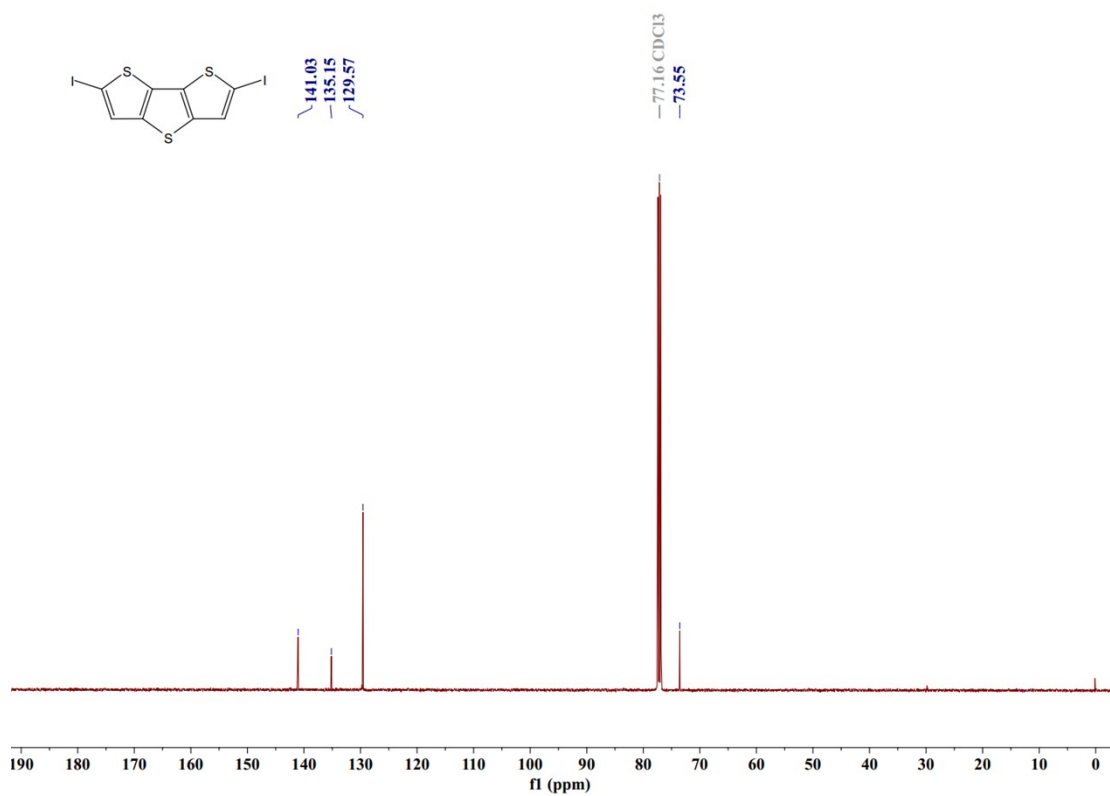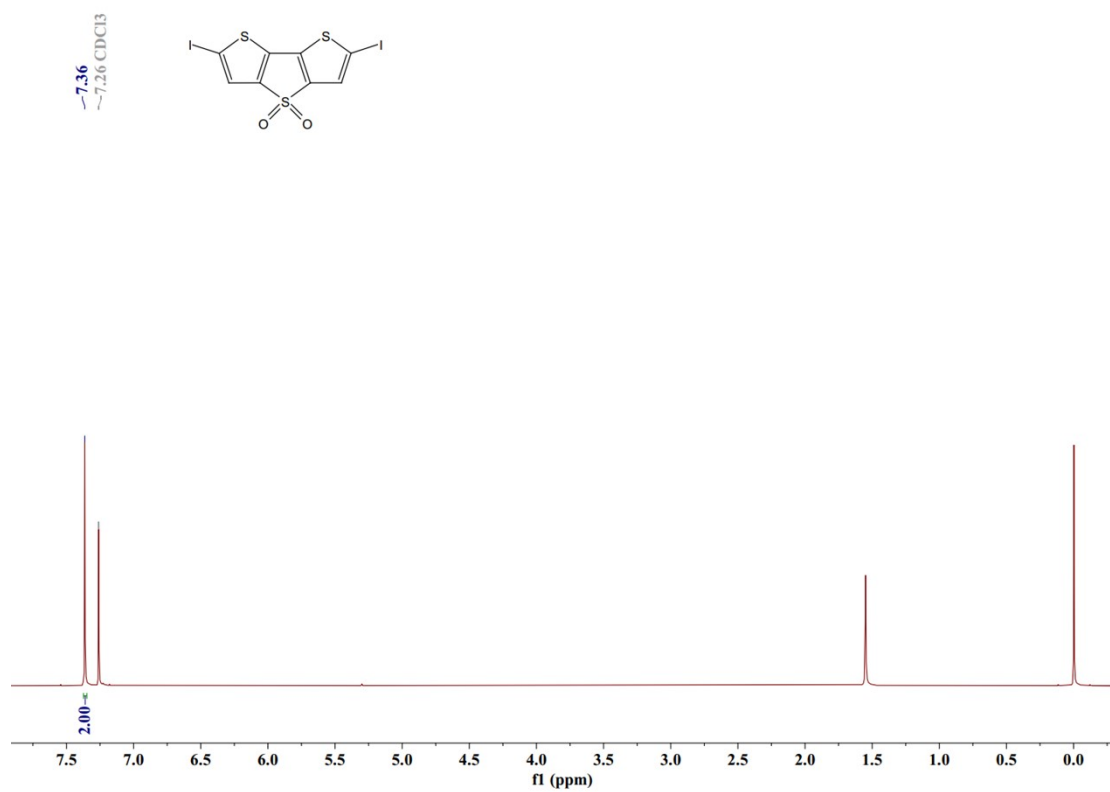

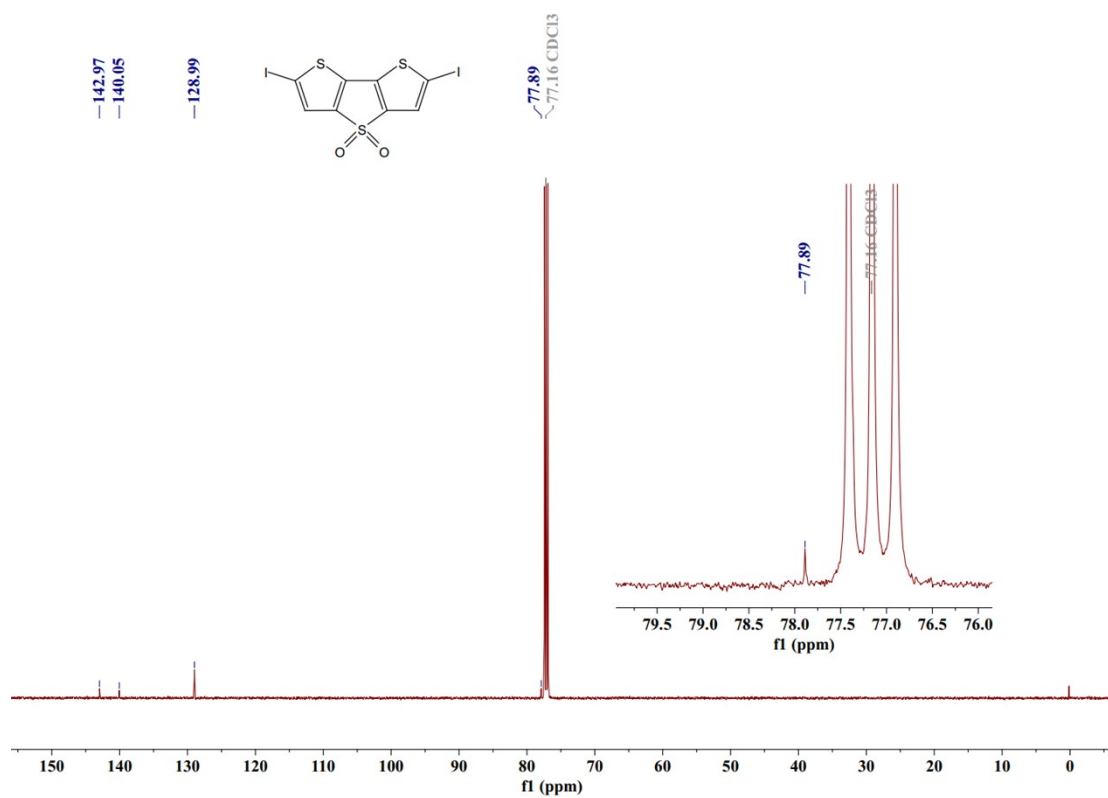

Figure S12. <sup>13</sup>C NMR spectrum of **DI-DTTO**.

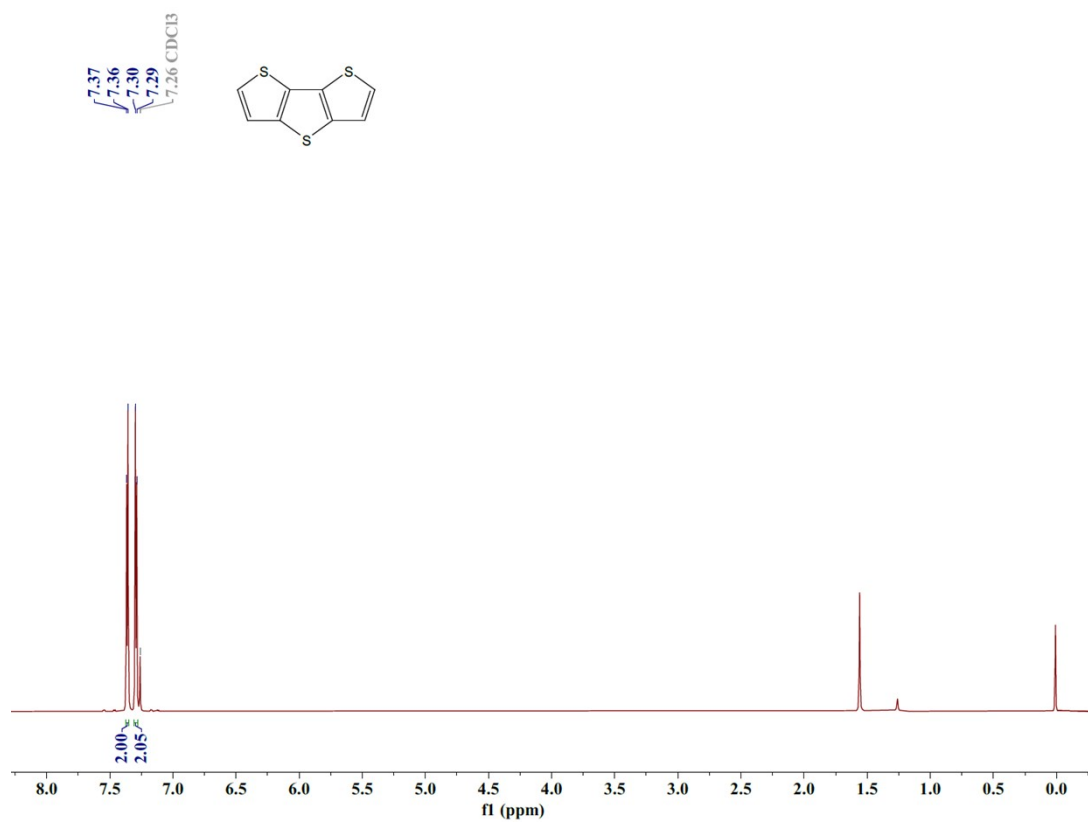

Figure S13. <sup>1</sup>H NMR spectrum of **DTT**.

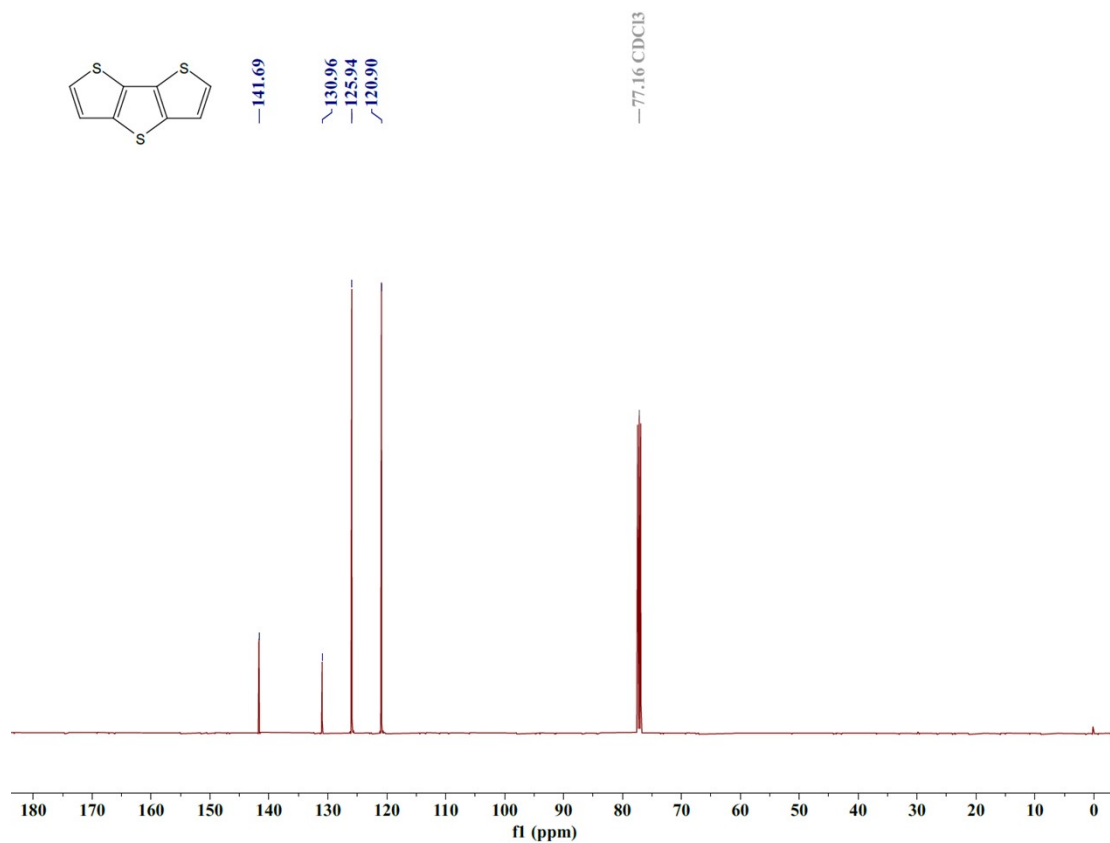

Figure S14.  $^{13}\text{C}$  NMR spectrum of **DTT**.

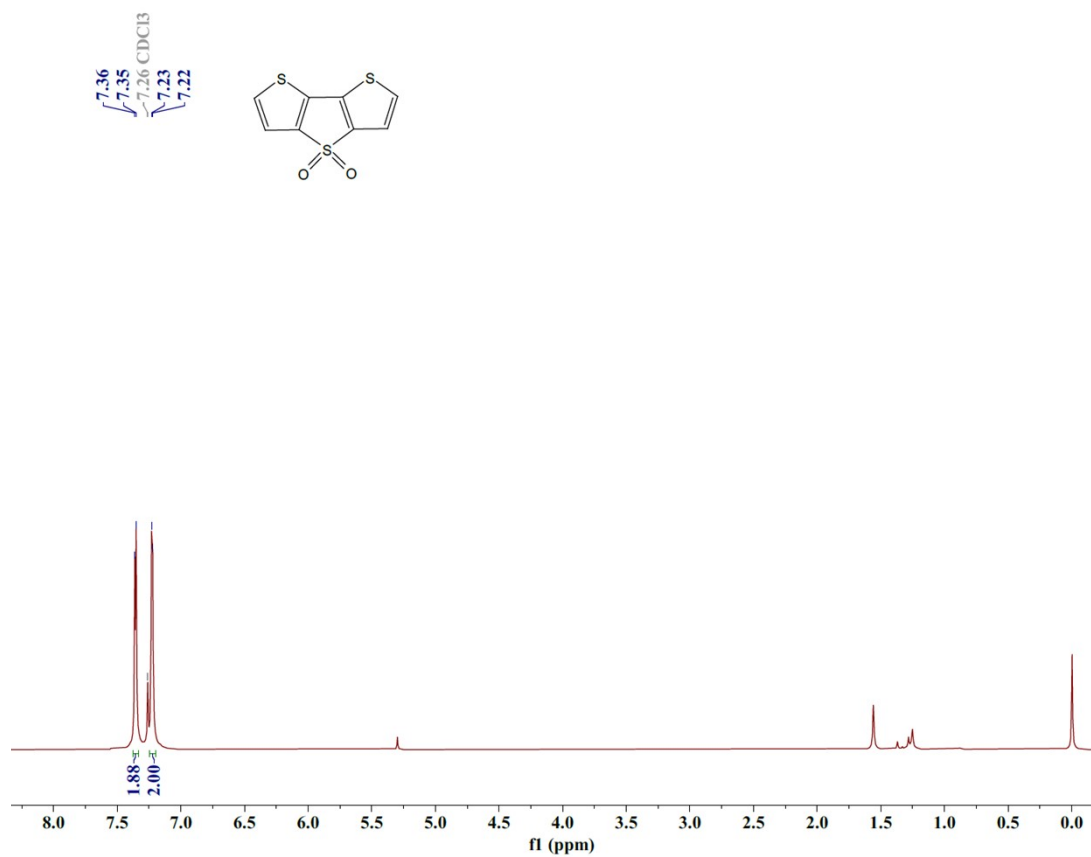

Figure S15.  $^1\text{H}$  NMR spectrum of **DTTO**.

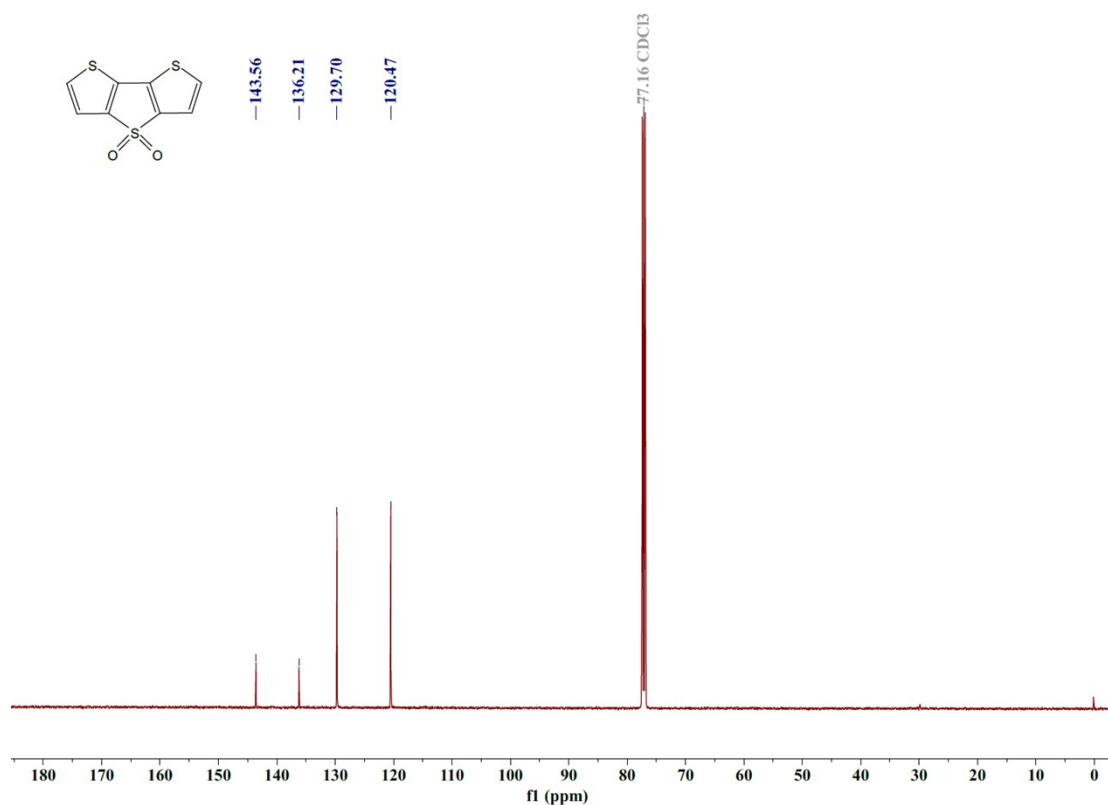

Figure S16.  $^{13}\text{C}$  NMR spectrum of **DTTO**.

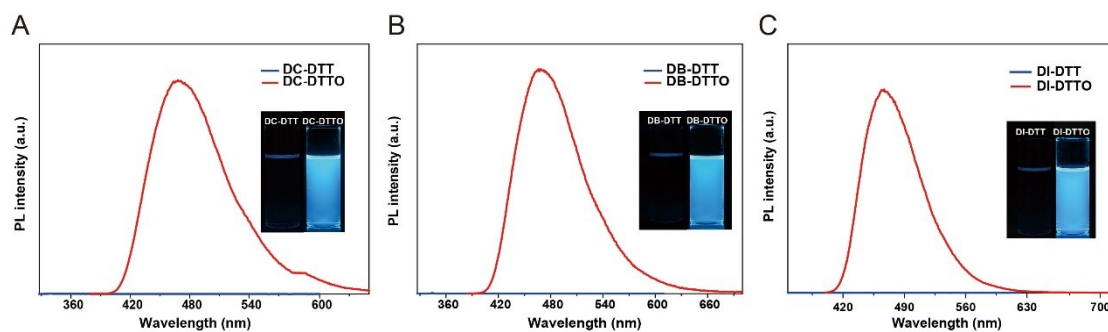

Figure S17. PL spectra of halogens substituted DTT and DTTO in THF. Inset: fluorescence photograph of halogens substituted DTT and DTTO in THF, respectively, taken under 365 nm UV irradiation.

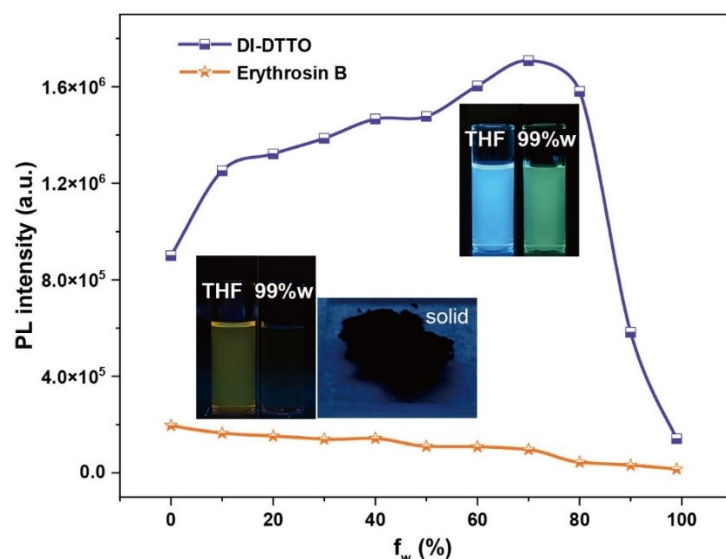

Figure S18. Plots of DI-DTTO and Erythrosin B in  $H_2O/THF$  mixtures. Inset: fluorescence photograph of DI-DTTO and Erythrosin B in pure THF and in 99%  $H_2O/THF$  mixtures, and Erythrosin B in solid state taken under 365 nm UV irradiation.

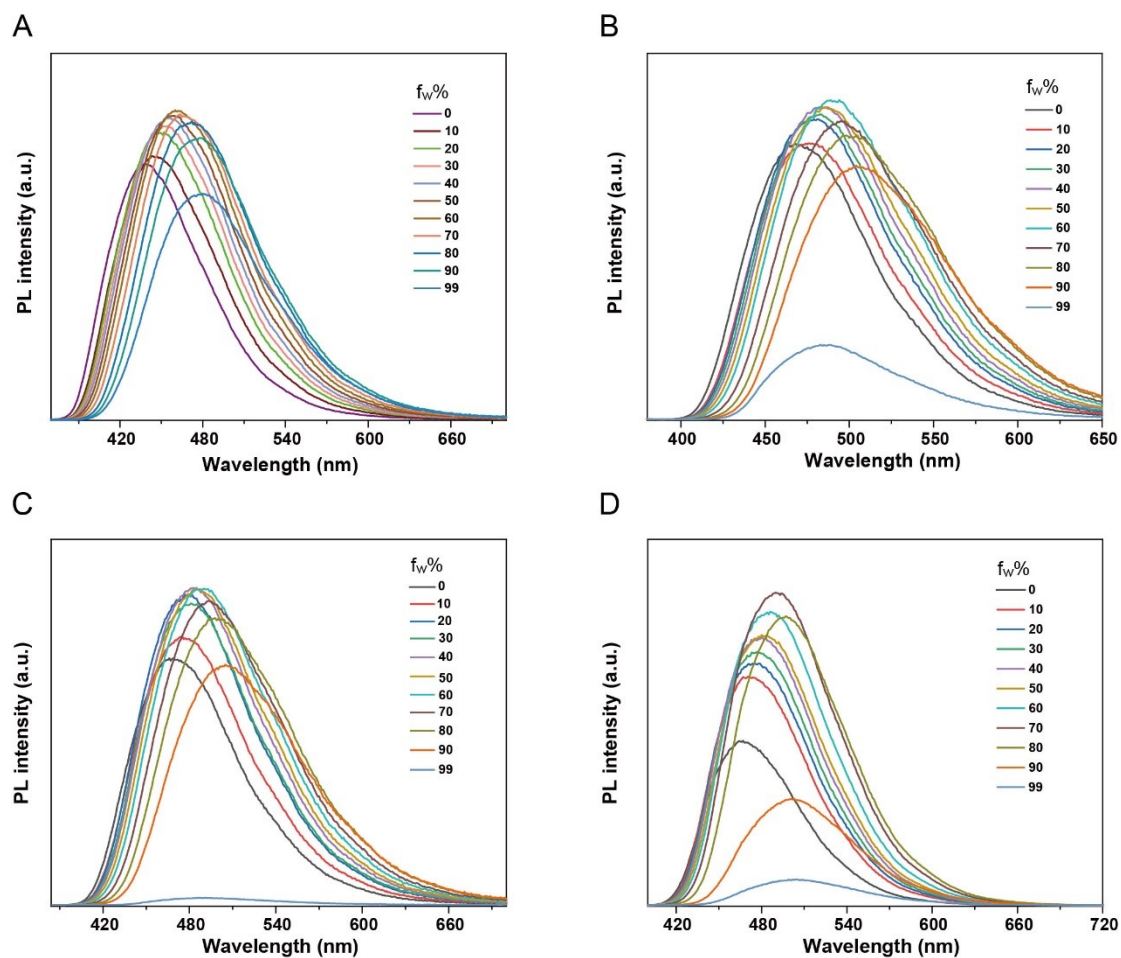

Figure S19. PL spectra of (A) DTTO, (B) DC-DTTO, (C) DB-DTTO and (D) DI-DTTO in  $THF/H_2O$  mixtures.

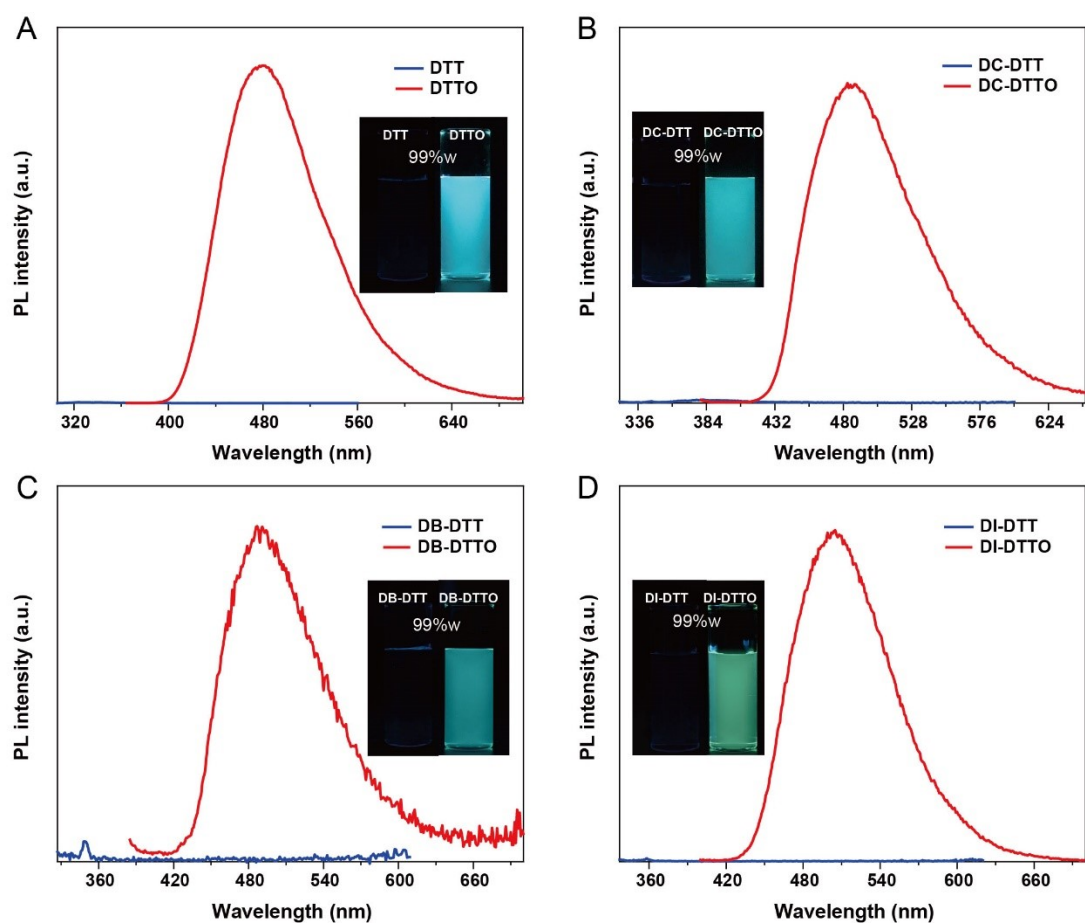

Figure S20. PL spectra of DTTs and DTTOs in 99%  $\text{H}_2\text{O}/\text{THF}$  mixtures. Inset: fluorescence photograph of DTTs and DTTOs in 99%  $\text{H}_2\text{O}/\text{THF}$  mixtures, respectively, taken under 365 nm UV irradiation.

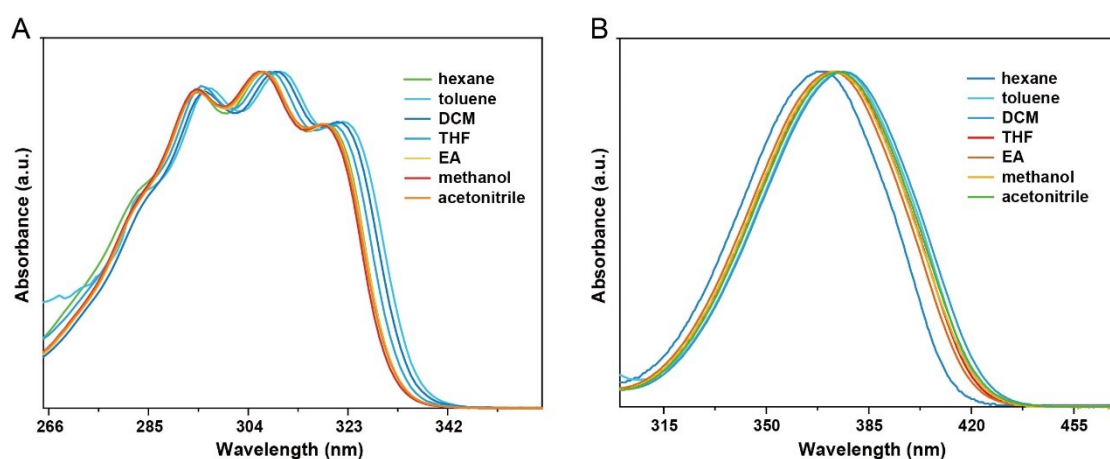

Figure S21 The UV-vis spectrums of DC-DTT (A) and DC-DTTO (B) in different polarity solvents.

**Supplementary Table S1** Crystallographic and structural refinement data of DTTO, DC-DTTO, DB-DTTO, DI-DTTO, DTT and DI-DTT.

|                                      | DTTO                                                         | DC-DTTO                                                                     |
|--------------------------------------|--------------------------------------------------------------|-----------------------------------------------------------------------------|
| CCDC                                 | 2378966                                                      | 2378911                                                                     |
| Empirical formula                    | C <sub>8</sub> H <sub>4</sub> O <sub>2</sub> S <sub>3</sub>  | C <sub>8</sub> H <sub>2</sub> O <sub>2</sub> S <sub>3</sub> Cl <sub>2</sub> |
| Formula weight                       | 228.29                                                       | 297.18                                                                      |
| Temperature/K                        | 293(2)                                                       | 293(2)                                                                      |
| Crystal system                       | monoclinic                                                   | monoclinic                                                                  |
| Space group                          | C2/c                                                         | C2/c                                                                        |
| a/Å                                  | 9.756(2)                                                     | 16.031(3)                                                                   |
| b/Å                                  | 12.219(2)                                                    | 6.9802(14)                                                                  |
| c/Å                                  | 7.5175(15)                                                   | 9.3455(19)                                                                  |
| α/°                                  | 90                                                           | 90                                                                          |
| β/°                                  | 102.31(3)                                                    | 101.26(3)                                                                   |
| γ/°                                  | 90                                                           | 90                                                                          |
| Volume/Å <sup>3</sup>                | 875.5(3)                                                     | 1025.6(4)                                                                   |
| Z                                    | 4                                                            | 4                                                                           |
| ρ <sub>calc</sub> /g/cm <sup>3</sup> | 1.732                                                        | 1.925                                                                       |
| μ/mm <sup>-1</sup>                   | 0.802                                                        | 1.213                                                                       |
| F(000)                               | 464.0                                                        | 592.0                                                                       |
| Crystal size/mm <sup>3</sup>         | 0.588 × 0.376 × 0.087                                        | 0.46 × 0.30 × 0.22                                                          |
| Radiation                            | MoKα (λ = 0.71073)                                           | MoKα (λ = 0.71073)                                                          |
| 2Θ range for data collection/°       | 6.67 to 50.03                                                | 6.386 to 50.026                                                             |
| Index ranges                         | -11 ≤ h ≤ 11, -14 ≤ k ≤ 14, -8 ≤ l ≤ 8                       | -18 ≤ h ≤ 18, -8 ≤ k ≤ 8, -11 ≤ l ≤ 11                                      |
| Reflections collected                | 3495                                                         | 3862                                                                        |
| Independent reflections              | 773 [R <sub>int</sub> = 0.0569, R <sub>sigma</sub> = 0.0506] | 902 [R <sub>int</sub> = 0.0722, R <sub>sigma</sub> = 0.1067]                |
| Data/restraints/parameters           | 773/0/61                                                     | 902/0/70                                                                    |



|                                                |                                  |                                  |
|------------------------------------------------|----------------------------------|----------------------------------|
| Goodness-of-fit on $F^2$                       | 1.090                            | 1.086                            |
| Final R indexes [ $I \geq 2\sigma(I)$ ]        | $R_1 = 0.0334$ , $wR_2 = 0.0936$ | $R_1 = 0.0353$ , $wR_2 = 0.0855$ |
| Final R indexes [all data]                     | $R_1 = 0.0354$ , $wR_2 = 0.0966$ | $R_1 = 0.0386$ , $wR_2 = 0.0874$ |
| Largest diff. peak/hole / $e \text{ \AA}^{-3}$ | 0.38/-0.34                       | 0.60/-0.44                       |

|                                               | DB-DTTO                                    | DI-DTTO                                    |
|-----------------------------------------------|--------------------------------------------|--------------------------------------------|
| CCDC                                          | 2378965                                    | 2378958                                    |
| Empirical formula                             | $C_8H_2Br_2O_2S_3$                         | $C_8H_2I_2O_2S_3$                          |
| Formula weight                                | 386.10                                     | 480.08                                     |
| Temperature/K                                 | 293(2)                                     | 293(2)                                     |
| Crystal system                                | monoclinic                                 | orthorhombic                               |
| Space group                                   | $C2/c$                                     | $Pca2_1$                                   |
| $a/\text{\AA}$                                | 16.412(3)                                  | 18.519(4)                                  |
| $b/\text{\AA}$                                | 6.9676(14)                                 | 4.9155(10)                                 |
| $c/\text{\AA}$                                | 9.5683(19)                                 | 12.812(3)                                  |
| $\alpha/^\circ$                               | 90                                         | 90                                         |
| $\beta/^\circ$                                | 99.34(3)                                   | 90                                         |
| $\gamma/^\circ$                               | 90                                         | 90                                         |
| Volume/ $\text{\AA}^3$                        | 1079.6(4)                                  | 1166.2(4)                                  |
| $Z$                                           | 4                                          | 4                                          |
| $\rho_{\text{calc}}/\text{g cm}^{-3}$         | 2.375                                      | 2.734                                      |
| $\mu/\text{mm}^{-1}$                          | 8.060                                      | 5.904                                      |
| $F(000)$                                      | 736.0                                      | 880.0                                      |
| Crystal size/ $\text{mm}^3$                   | $0.27 \times 0.23 \times 0.11$             | $0.417 \times 0.079 \times 0.070$          |
| Radiation                                     | $\text{MoK}\alpha$ ( $\lambda = 0.71073$ ) | $\text{MoK}\alpha$ ( $\lambda = 0.71073$ ) |
| $2\Theta$ range for data collection/ $^\circ$ | 6.366 to 49.716                            | 6.36 to 50.026                             |

|                                             |                                                              |                                                               |
|---------------------------------------------|--------------------------------------------------------------|---------------------------------------------------------------|
| Index ranges                                | -19 ≤ h ≤ 19, -8 ≤ k ≤ 8, -11 ≤ l ≤ 11                       | -21 ≤ h ≤ 22, -5 ≤ k ≤ 5, -15 ≤ l ≤ 15                        |
| Reflections collected                       | 4131                                                         | 8041                                                          |
| Independent reflections                     | 933 [R <sub>int</sub> = 0.0898, R <sub>sigma</sub> = 0.0709] | 2043 [R <sub>int</sub> = 0.1098, R <sub>sigma</sub> = 0.1255] |
| Data/restraints/parameters                  | 933/0/70                                                     | 2043/1/137                                                    |
| Goodness-of-fit on F <sup>2</sup>           | 1.168                                                        | 1.030                                                         |
| Final R indexes [I ≥ 2σ (I)]                | R <sub>1</sub> = 0.0525, wR <sub>2</sub> = 0.1169            | R <sub>1</sub> = 0.0524, wR <sub>2</sub> = 0.1010             |
| Final R indexes [all data]                  | R <sub>1</sub> = 0.0779, wR <sub>2</sub> = 0.1686            | R <sub>1</sub> = 0.0615, wR <sub>2</sub> = 0.1135             |
| Largest diff. peak/hole / e Å <sup>-3</sup> | 0.91/-1.12                                                   | 1.28/-1.08                                                    |

|                                      | DTT [2]                                      | DI-DTT [3]                                                  |
|--------------------------------------|----------------------------------------------|-------------------------------------------------------------|
| Empirical formula                    | C <sub>8</sub> H <sub>4</sub> S <sub>3</sub> | C <sub>8</sub> H <sub>2</sub> I <sub>2</sub> S <sub>3</sub> |
| Formula weight                       | 196.29                                       | 448.08                                                      |
| Temperature/K                        | 100(2)                                       | 100(2)                                                      |
| Crystal system                       | monoclinic                                   | monoclinic                                                  |
| Space group                          | P2 <sub>1</sub> /c                           | P2 <sub>1</sub> /n                                          |
| a/Å                                  | 10.277(4)                                    | 13.223(9)                                                   |
| b/Å                                  | 3.9383(14)                                   | 4.161(3)                                                    |
| c/Å                                  | 19.313(7)                                    | 19.785(14)                                                  |
| α/°                                  | 90.00                                        | 90.00                                                       |
| β/°                                  | 102.528(5)                                   | 96.339(10)                                                  |
| γ/°                                  | 90.00                                        | 90.00                                                       |
| Volume/Å <sup>3</sup>                | 763.1(5)                                     | 1081.9(13)                                                  |
| Z                                    | 4                                            | 4                                                           |
| ρ <sub>calc</sub> /g/cm <sup>3</sup> | 1.709                                        | 2.751                                                       |
| μ/mm <sup>-1</sup>                   | 0.886                                        | 6.341                                                       |

|                                             |                                                               |                                                               |
|---------------------------------------------|---------------------------------------------------------------|---------------------------------------------------------------|
| F(000)                                      | 400.0                                                         | 816.0                                                         |
| Crystal size/mm <sup>3</sup>                | 0.2 × 0.15 × 0.1                                              | 0.5 × 0.07 × 0.04                                             |
| Radiation                                   | MoK $\alpha$ ( $\lambda$ = 0.71073)                           | MoK $\alpha$ ( $\lambda$ = 0.71073)                           |
| 2 $\Theta$ range for data collection/°      | 4.06 to 60.08                                                 | 4.14 to 58                                                    |
| Index ranges                                | -14 ≤ h ≤ 14, -5 ≤ k ≤ 5, -26 ≤ l ≤ 26                        | -18 ≤ h ≤ 17, -5 ≤ k ≤ 5, -26 ≤ l ≤ 26                        |
| Reflections collected                       | 11077                                                         | 9493                                                          |
| Independent reflections                     | 2245 [R <sub>int</sub> = 0.0601, R <sub>sigma</sub> = 0.0474] | 2872 [R <sub>int</sub> = 0.0843, R <sub>sigma</sub> = 0.0966] |
| Data/restraints/parameters                  | 2245/0/100                                                    | 2872/0/118                                                    |
| Goodness-of-fit on F <sup>2</sup>           | 1.017                                                         | 1.052                                                         |
| Final R indexes [I ≥ 2 $\sigma$ (I)]        | R <sub>1</sub> = 0.0350, wR <sub>2</sub> = 0.0729             | R <sub>1</sub> = 0.0635, wR <sub>2</sub> = 0.1397             |
| Final R indexes [all data]                  | R <sub>1</sub> = 0.0550, wR <sub>2</sub> = 0.0817             | R <sub>1</sub> = 0.0939, wR <sub>2</sub> = 0.1521             |
| Largest diff. peak/hole / e Å <sup>-3</sup> | 0.46/-0.38                                                    | 2.06/-1.26                                                    |

---

## References:

- [1] Orca. <https://orcaforum.kofo.mpg.de> (accessed June 3, 2025).
- [2] R. Castañeda, V. N. Khrustalev, A. Fonari, J.-L. Bredas, Y. A. Getmanenko, T. V. Timofeeva, *J. Mol. Struct.* **2015**, *1100*, 506-512.
- [3] R. S. Sa´Nchez-Carrera, S. A. Odom, T. L. Kinnibrugh, T. Sajoto, E. G. Kim, T. V. Timofeeva, S. Barlow, V. Coropceanu, S. R. Marder, J.L. Bre´Das, *J. Phys. Chem. B*, 2010, **114** 749–755.
